# Supplementary material
Source: PubMed Central journal article supplement (PMC3156204)
Supplement: 1018456108_pnas.201018456SI.pdf [file 1018456108_pnas.201018456SI.pdf]

# Supporting Information

Roberts et al. 10.1073/pnas.1018456108

## SI Materials and Methods

**Pixel Density Analysis (PDA).** To determine and compare the relative amounts of *Ptch1* transcript within the region of the pharyngeal skeleton that contains the retroarticular process, PDA was performed as described previously (1, 2). In brief, after whole-mount in situ hybridization (WISH), specimens were mounted in 80% glycerol and photographed with a Zeiss Axiocam digital imaging system mounted to an M2 Bio stereomicroscope (Zeiss). Homologous areas within the jaw were selected using the lasso tool in Adobe Photoshop, and the total number of pixels within that region was determined using the histogram tool (Fig. S4). Next, the relative area in which *Ptch1* was expressed was measured by selecting for pixels that were the color of the in situ reaction (i.e., purple–dark purple) using the “select color range” option within Photoshop. For *Ptch1* and *Gli1* expression this analysis was performed on the area ventral to the eye (as shown in Fig. S4). Because *Colla1* expression is more restrictive, PDA was performed on the region immediately adjacent to the RA (i.e., Fig. 3D, main text). Finally, as a point of comparison, similar analyses were performed using all three probes on the caudal fin. (GenBank accession nos.: *Gli1*, JN037689; *Ptch1*, JN0376990 and JN037691; *Rad26l*, JN037692 and JN037693; *Colla1*, JN116727).

**Quantitative PCR Analysis.** Larval fish were staged as described in the main text, and tissue microdissected at 6.5 days postfertilization (dpf) and preserved in RNAlater (Ambion). Lower jaw cartilage back to and including the first four ventral pharyngeal arch tissues (i.e., the mandibular, hyoid, and branchial arches 1 and 2) were taken, as were the tail and trunk posterior of the yolk sac. RNA was isolated using the RNeasy kit (Qiagen) and quantified by absorbance. Normalized RNA was used as template for reverse transcription by SuperScript III (Invitrogen). Primer-probe sets were designed across exon junctions using Primer Express (Applied Biosystems) software (*Ptch1*: forward, 5'-TTCTGATGCTGG-CCTATGCA-3'; reverse, 5'-CCCCTGAGACTTGGCACAGT-3'; probe, 5'-6FAM-CCTGACCATGCTGCGAT-TAMRA-3'; *Rad26l*: forward, 5'-CGAGTCCAGATCGTCAGAGACTT-3'; reverse, 5'-CACCTGCCATGGTGGAAAC-3'; probe, 5'-6FAM-AACAGCTCCTCTCACATC-TAMRA-3'). Real-time PCR reactions used Taqman Universal PCR Master Mix (Applied Biosystems) and were run on a Roche Lightcycler 480. Relative expression was calculated using the  $2^{-\Delta\Delta CT}$  method (3), normalizing to  $\beta$ -actin expression as an endogenous control.

1. Albertson RC, Yelick PC (2007) Fgf8 haploinsufficiency results in distinct craniofacial defects in adult zebrafish. *Dev Biol* 306:505–515.
2. Cooper WJ, Albertson RC (2008) Quantification and variation in experimental studies of morphogenesis. *Dev Biol* 321:295–302.

3. Livak KJ, Schmittgen TD (2001) Analysis of relative gene expression data using real-time quantitative PCR and the  $2^{-\Delta\Delta CT}$  Method. *Methods* 25:402–408.



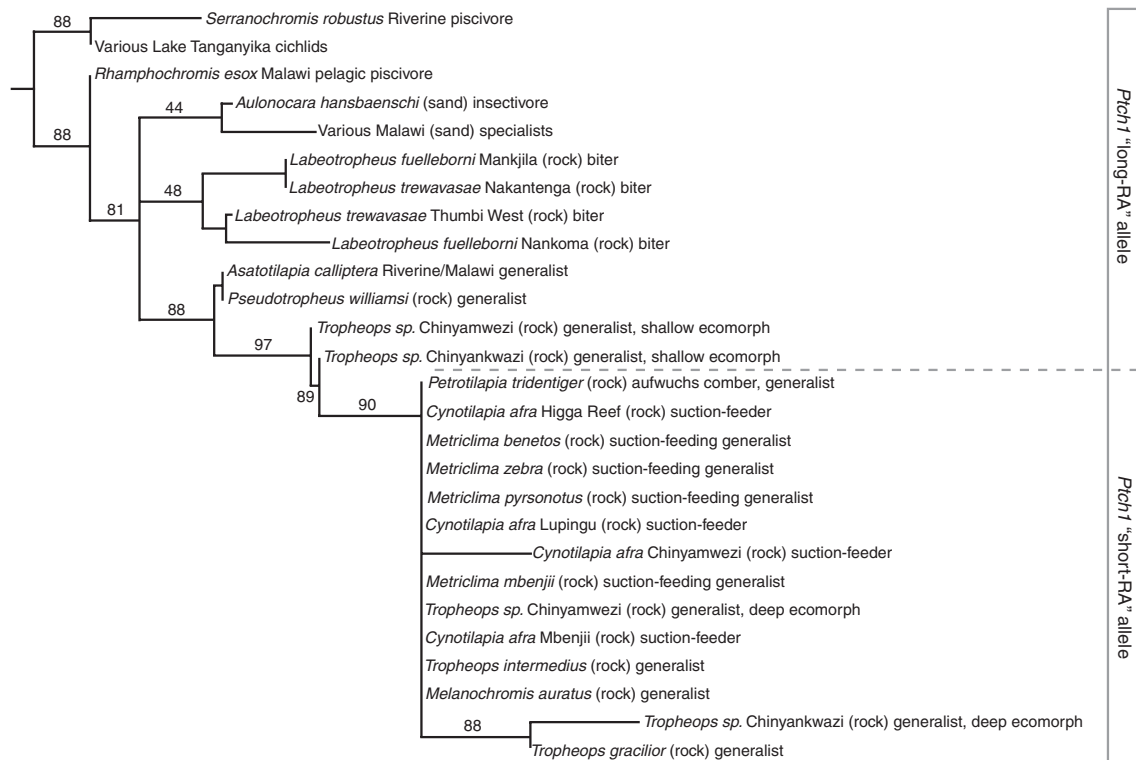

**Fig. S2.** *Ptch1* gene tree. Neighbor-joining tree of representative *Ptch1* locus genotypes by species and site, based on 32 polymorphic sites. Haplotypes with the “short” *Ptch1* allele SNP genotype at the high  $MA_{\text{O}}$  association SNP (Fig. 1F, main text) form a single derived clade found in Malawi rock-dwelling cichlids. The gene tree can be contrasted to previously published species phylogenies of the three genera analyzed in the main text (1) and East African cichlids in general (2). Gene tree created with MAFFT (3).

1. Albertson RC, Markert JA, Danley PD, Kocher TD (1999) Phylogeny of a rapidly evolving clade: The cichlid fishes of Lake Malawi, East Africa. *Proc Natl Acad Sci USA* 96:5107–5110.
2. O’Quin KE, Hofmann CM, Hofmann HA, Carleton KL (2010) Parallel evolution of opsin gene expression in African cichlid fishes. *Mol Biol Evol* 27:2839–2854.
3. Katoh K, Misawa K, Kuma K, Miyata T (2002) MAFFT: A novel method for rapid multiple sequence alignment based on fast Fourier transform. *Nucleic Acids Res* 30:3059–3066.



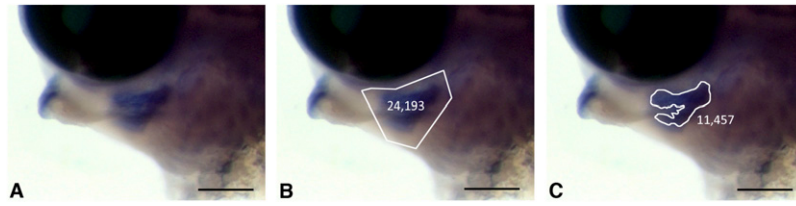

**Fig. S4.** Pixel density analysis of *Ptch1* WISH results. After WISH, specimens were mounted in 80% glycerol and photographed (A). (B) Homologous areas within the jaw were selected using the lasso tool in Adobe Photoshop, and (C) the “select color range” option within Photoshop was used to select pixels that were the color of the in situ reaction. (Scale bar, 200  $\mu$ m.)



**Table S2. Species and populations used in study**

| Species                             | Location          | Niche     | <i>n</i> | Trophic mode               | Comparison      |
|-------------------------------------|-------------------|-----------|----------|----------------------------|-----------------|
| <i>Astatotilapia calliptera</i>     | Riverine (Malawi) | —         | 1        | —                          | Fig. S1         |
| <i>Aulonocara hansbaenschii</i>     | Otter Point       | Rock/Sand | 1        | Insectivore                | Fig. S1         |
| <i>Benthochromis tricoti</i>        | Lake Tanganyika   | —         | 1        | —                          | Fig. S1         |
| <i>Cynotilapia afra</i>             | Thumbi West       | Rock      | 2        | Suction feeding            | Fig. 2          |
| <i>Cynotilapia afra</i>             | Chiofu Bay        | Rock      | 1        | Suction feeding            | Fig. 2          |
| <i>Cynotilapia afra</i>             | Chinyamwezi       | Rock      | 22       | Suction feeding            | Fig. 2          |
| <i>Fossorochromis rostratus</i>     | Chembe            | Sand      | 1        | Sifter                     | Fig. S1         |
| <i>Hemitilapia oxyrhynchus</i>      | Masasa            | Sand      | 1        | Leaf cleaner               | Fig. S1         |
| <i>Labeotropheus fuelleborni</i>    | Makanjila Point   | Rock      | 6        | Biting                     | Fig. 1E         |
| <i>Labeotropheus fuelleborni</i>    | Nankoma Rib.G     | Rock      | 6        | Biting                     | Fig. 1E         |
| <i>Labeotropheus fuelleborni</i>    | Makanjila Point   | Rock      | 13       | Biting                     | Fig. 2          |
| <i>Labeotropheus fuelleborni</i>    | Chiofu Bay        | Rock      | 13       | Biting                     | Fig. 2          |
| <i>Labeotropheus fuelleborni</i>    | Eccles Reef       | Rock      | 5        | Biting                     | Fig. 2          |
| <i>Labeotropheus fuelleborni</i>    | Chinyamwezi       | Rock      | 14       | Biting                     | Fig. 2          |
| <i>Labeotropheus fuelleborni</i>    | Chinyankwazi      | Rock      | 11       | Biting                     | Fig. 2          |
| <i>Labeotropheus trewavasae</i>     | Thumbi West       | Rock      | 6        | Biting                     | Fig. 1E         |
| <i>Labeotropheus trewavasae</i>     | Nakantenga        | Rock      | 6        | Biting                     | Fig. 1E         |
| <i>Lethrinops auritus</i>           | Otter Island      | Sand      | 1        | Sifter                     | Fig. S1         |
| <i>Melanochromis auratus</i>        | Otter Point       | Rock      | 1        | Omnivore                   | Fig. S1         |
| <i>Metriaclima aurora</i>           | Thumbi West       | Rock      | 1        | Suction feeding generalist | Fig. 2          |
| <i>Metriaclima aurora</i>           | Otter Point       | Rock      | 7        | Suction feeding generalist | Fig. 2          |
| <i>Metriaclima benetos</i>          | Mazinzi Reef      | Rock      | 6        | Suction feeding generalist | Fig. 1E         |
| <i>Metriaclima benetos</i>          | Mazinzi Reef      | Rock      | 9        | Suction feeding generalist | Fig. 2          |
| <i>Metriaclima mbenjii</i>          | Mbenji Island     | Rock      | 6        | Suction feeding generalist | Fig. 1E         |
| <i>Metriaclima pysonotus</i>        | Nakantenga        | Rock      | 6        | Suction feeding generalist | Fig. 1E         |
| <i>Metriaclima zebra</i>            | Thumbi West       | Rock      | 6        | Suction feeding generalist | Fig. 1E         |
| <i>Ophthalmotilapia ventralis</i>   | Lake Tanganyika   | —         | 1        | —                          | Fig. S1         |
| <i>Paracyprichromis nigrapinnis</i> | Lake Tanganyika   | —         | 1        | —                          | Fig. S1         |
| <i>Petrochromis famula</i>          | Lake Tanganyika   | —         | 1        | —                          | Fig. S1         |
| <i>Petrotilapia tridentiger</i>     | Ikambe Sanga      | Rock      | 1        | Aufwuchs comber            | Fig. S1         |
| <i>Protomelas taeniolatus</i>       | Thumbi West       | Sand      | 1        | Suction feeding            | Fig. S1         |
| <i>Pseudotropheus williamsi</i>     | Thumbi West       | Rock      | 1        | Insectivore                | Fig. S1         |
| <i>Rhamphochromis esox</i>          | Otter Point       | Pelagic   | 1        | Piscivore                  | Fig. S1         |
| <i>Serranochromis robustus</i>      | Riverine (Malawi) | —         | 1        | —                          | Fig. S1         |
| <i>Tanganicodus irsacae</i>         | Lake Tanganyika   | —         | 1        | —                          | Fig. S1         |
| <i>Tropheops gracilior</i>          | Otter Island      | Rock      | 12       | Biting/suction             | Fig. 1F, Fig. 2 |
| <i>Tropheops intermedius</i>        | Thumbi West       | Rock      | 12       | Biting/suction             | Fig. 1F, Fig. 2 |
| <i>Tropheops sp.</i>                | Chinyankwazi      | Rock      | 15       | Biting/suction             | Fig. 1F, Fig. 2 |
| <i>Tropheops sp.</i>                | Chinyamwezi       | Rock      | 20       | Biting/suction             | Fig. 1F, Fig. 2 |

**Table S3. Pixel density analysis of WISH**

| Species                          | Treatment* | Gene          | Tissue <sup>†</sup> | n | Proportion labeled pixels (mean ± SE) | t             | DF        | P (t test) <sup>‡</sup> |
|----------------------------------|------------|---------------|---------------------|---|---------------------------------------|---------------|-----------|-------------------------|
| <i>Metriaclima zebra</i>         | None       | <i>Ptch1</i>  | Lower jaw           | 7 | 0.260 ± 0.032                         | <b>4.285</b>  | <b>13</b> | <b>0.0009</b>           |
| <i>Labeotropheus fuelleborni</i> | None       | <i>Ptch1</i>  | Lower jaw           | 8 | 0.448 ± 0.030                         |               |           |                         |
| <i>Metriaclima zebra</i>         | None       | <i>Ptch1</i>  | Tail                | 7 | 0.134 ± 0.006                         | 0.906         | 13        | 0.39                    |
| <i>Labeotropheus fuelleborni</i> | None       | <i>Ptch1</i>  | Tail                | 8 | 0.142 ± 0.006                         |               |           |                         |
| <i>Metriaclima zebra</i>         | None       | <i>Gli1</i>   | Lower jaw           | 5 | 0.216 ± 0.020                         | <b>4.604</b>  | <b>8</b>  | <b>0.002</b>            |
| <i>Labeotropheus fuelleborni</i> | None       | <i>Gli1</i>   | Lower jaw           | 5 | 0.357 ± 0.023                         |               |           |                         |
| <i>Metriaclima zebra</i>         | None       | <i>Gli1</i>   | Tail                | 5 | 0.115 ± 0.010                         | 0.335         | 8         | 0.74                    |
| <i>Labeotropheus fuelleborni</i> | None       | <i>Gli1</i>   | Tail                | 5 | 0.119 ± 0.005                         |               |           |                         |
| <i>Metriaclima zebra</i>         | None       | <i>Col1a1</i> | RA                  | 3 | 0.212 ± 0.012                         | <b>3.434</b>  | <b>6</b>  | <b>0.027</b>            |
| <i>Labeotropheus fuelleborni</i> | None       | <i>Col1a1</i> | RA                  | 3 | 0.283 ± 0.017                         |               |           |                         |
| <i>Metriaclima zebra</i>         | None       | <i>Col1a1</i> | Tail                | 3 | 0.327 ± 0.005                         | <b>3.877</b>  | <b>6</b>  | <b>0.018</b>            |
| <i>Labeotropheus fuelleborni</i> | None       | <i>Col1a1</i> | Tail                | 3 | 0.286 ± 0.010                         |               |           |                         |
| <i>Labeotropheus fuelleborni</i> | Cyc        | <i>Ptch1</i>  | Lower jaw           | 5 | 0.122 ± 0.019                         | <b>5.926</b>  | <b>8</b>  | <b>0.0004</b>           |
| <i>Labeotropheus fuelleborni</i> | Control    | <i>Ptch1</i>  | Lower jaw           | 5 | 0.417 ± 0.048                         |               |           |                         |
| <i>Labeotropheus fuelleborni</i> | Cyc        | <i>Ptch1</i>  | Tail                | 5 | 0.027 ± 0.005                         | <b>15.844</b> | <b>8</b>  | <b>0.0001</b>           |
| <i>Labeotropheus fuelleborni</i> | Control    | <i>Ptch1</i>  | Tail                | 5 | 0.118 ± 0.009                         |               |           |                         |
| <i>Labeotropheus fuelleborni</i> | Cyc        | <i>Gli1</i>   | Lower jaw           | 5 | 0.208 ± 0.022                         | <b>5.011</b>  | <b>8</b>  | <b>0.001</b>            |
| <i>Labeotropheus fuelleborni</i> | Control    | <i>Gli1</i>   | Lower jaw           | 5 | 0.373 ± 0.024                         |               |           |                         |
| <i>Labeotropheus fuelleborni</i> | Cyc        | <i>Gli1</i>   | Tail                | 5 | 0.033 ± 0.002                         | <b>13.815</b> | <b>8</b>  | <b>&lt; 0.0001</b>      |
| <i>Labeotropheus fuelleborni</i> | Control    | <i>Gli1</i>   | Tail                | 5 | 0.127 ± 0.006                         |               |           |                         |
| <i>Labeotropheus fuelleborni</i> | Cyc        | <i>Col1a1</i> | RA                  | 3 | 0.162 ± 0.012                         | <b>5.325</b>  | <b>6</b>  | <b>0.006</b>            |
| <i>Labeotropheus fuelleborni</i> | Control    | <i>Col1a1</i> | RA                  | 3 | 0.294 ± 0.021                         |               |           |                         |
| <i>Labeotropheus fuelleborni</i> | Cyc        | <i>Col1a1</i> | Tail                | 3 | 0.339 ± 0.009                         | <b>4.062</b>  | <b>6</b>  | <b>0.015</b>            |
| <i>Labeotropheus fuelleborni</i> | Control    | <i>Col1a1</i> | Tail                | 3 | 0.289 ± 0.009                         |               |           |                         |

\*See *Materials and Methods* in main text (Cyc, 50 μM cyclopamine in ethanol; Control, ethanol control).

<sup>†</sup>See *SI Materials and Methods* for exact regions analyzed.

<sup>‡</sup>Boldface indicates significance based on a threshold of  $P < 0.05$ .

**Table S4. Quantitative PCR gene expression analysis in microdissected tissue**

| Species                         | Gene          | Tissue     | n | Expression (mean ± SE)* | t             | DF       | P (t test) <sup>†</sup> |
|---------------------------------|---------------|------------|---|-------------------------|---------------|----------|-------------------------|
| <i>Metriaclima zebra</i>        | <i>Ptch1</i>  | Lower jaw  | 6 | 1.033 ± 0.050           | <b>-3.177</b> | <b>9</b> | <b>0.011</b>            |
| <i>Labeotropheus trewavasae</i> | <i>Ptch1</i>  | Lower jaw  | 5 | 1.268 ± 0.055           |               |          |                         |
| <i>Metriaclima zebra</i>        | <i>Ptch1</i>  | Trunk/tail | 6 | 1.023 ± 0.085           | 0.729         | 9        | 0.48                    |
| <i>Labeotropheus trewavasae</i> | <i>Ptch1</i>  | Trunk/tail | 5 | 0.931 ± 0.093           |               |          |                         |
| <i>Metriaclima zebra</i>        | <i>Rad26l</i> | Lower jaw  | 6 | 1.015 ± 0.036           | -0.944        | 9        | 0.37                    |
| <i>Labeotropheus trewavasae</i> | <i>Rad26l</i> | Lower jaw  | 5 | 1.066 ± 0.040           |               |          |                         |
| <i>Metriaclima zebra</i>        | <i>Rad26l</i> | Trunk/tail | 6 | 1.036 ± 0.076           | -1.095        | 9        | 0.30                    |
| <i>Labeotropheus trewavasae</i> | <i>Rad26l</i> | Trunk/tail | 5 | 1.160 ± 0.084           |               |          |                         |

\*Relative transcript level vs. *M. zebra* average for each gene and tissue, normalized to β-actin transcript level as endogenous control (*SI Materials and Methods*).

<sup>†</sup>Boldface indicates significance based on a threshold of  $P < 0.05$ .

**Table S5. Lower jaw measurements in larval fish**

| Species                          | Treatment*        | n  | Outlever (μm) (mean ± SD) | Inlever (μm) (mean ± SD) | MA <sub>O</sub> (mean ± SD) |
|----------------------------------|-------------------|----|---------------------------|--------------------------|-----------------------------|
| <i>Labeotropheus fuelleborni</i> | untreated control | 6  | 1147.9 ± 83.0             | 288.2 ± 22.0             | 0.251 ± 0.019               |
| <i>Labeotropheus fuelleborni</i> | ethanol control   | 7  | 1176.9 ± 339.4            | 296.5 ± 94.2             | 0.250 ± 0.035               |
| <i>Labeotropheus fuelleborni</i> | 50 μM cyclopamine | 10 | 1127.2 ± 131.1            | 212.3 ± 24.4             | 0.190 ± 0.023               |
| <i>Metriaclima zebra</i>         | untreated control | 7  | 1516.1 ± 70.2             | 311.6 ± 33.6             | 0.206 ± 0.026               |

MA<sub>O</sub>, mechanical advantage of opening.

\*See *Materials and Methods* in main text.
